# Supplementary material
Source: Springer Nature journal article supplement (https://www.springermedizin.de/resource/supplementary/12913_2011_2171_MOESM1_ESM.pdf/9529578)
Supplement: MOESM1 [file 9529578]

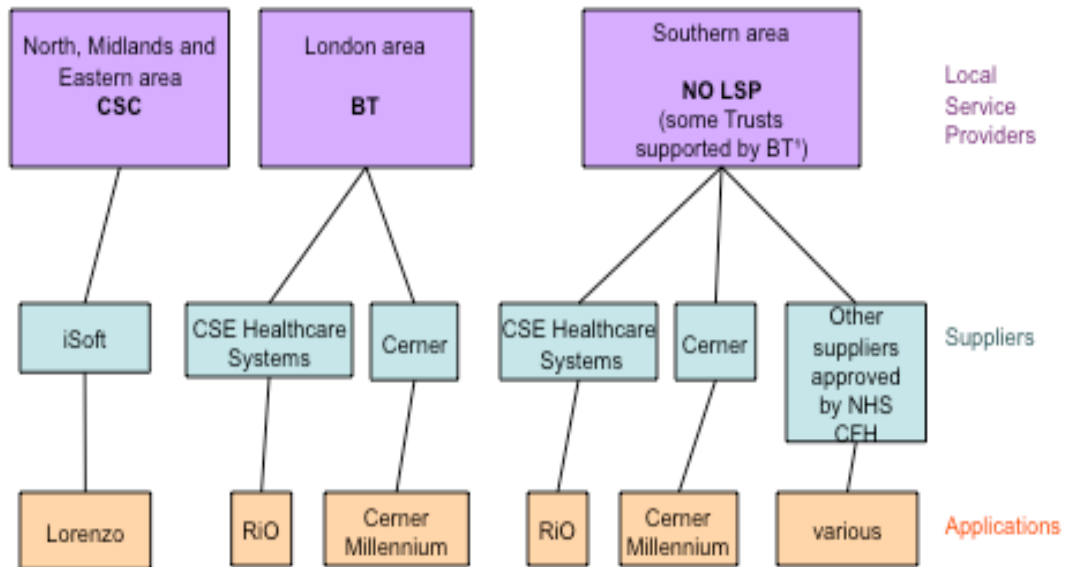

<sup>1</sup>BT took over 8 Trusts with Cerner Millennium from former Southern LSP, Fujitsu, plus has a new contract for 4 acute and 25 RiO sites in the Southern area
